# Supplementary material for: A detection system using sensing motif-tethered oligodeoxynucleotides for multiplex biomolecular analysis
Source: Royal Society of Chemistry journal article supplement (doi:10.1039/d4cc01470g), 2024-01-01
Supplement: d4cc01470g1.pdf [file d4cc01470g1.pdf]

## Supplementary Information

### A Detection System Using Sensing Motif-tethered Oligodeoxynucleotides for the Multiplex Biomolecular Analysis

Tatsuya Nishihara<sup>\*,†</sup>, Yuto Motohashi<sup>†</sup>, Reoto Mio, Masato Sugawara, Kazuhito  
Tanabe<sup>\*</sup>

Department of Chemistry and Biological Science, College of Science and Engineering, Aoyama Gakuin  
University, 5-10-1 Fuchinobe, Chuo-ku, Sagami-hara, 252-5258, Japan

<sup>\*</sup>Correspondence author: [nishihara@chem.aoyama.ac.jp](mailto:nishihara@chem.aoyama.ac.jp), [tanabe.kazuhito@chem.aoyama.ac.jp](mailto:tanabe.kazuhito@chem.aoyama.ac.jp)

## Table of Contents

|                                                                                              |            |
|----------------------------------------------------------------------------------------------|------------|
| <b>1. Supporting Methods</b>                                                                 | <b>S2</b>  |
| <b>1-1. Synthesis</b>                                                                        | <b>S2</b>  |
| <b>1-2. Reaction monitoring of Mal-DNA1, PB-DNA1 and Biotin-SS-DNA1</b>                      | <b>S3</b>  |
| <b>1-3. Detection of target molecules by using qPCR</b>                                      | <b>S6</b>  |
| <b>1-4. Detection of GSH in cell extract</b>                                                 | <b>S9</b>  |
| <b>2. Supporting Figures</b>                                                                 | <b>S11</b> |
| <b>Figure S1. Synthesis of Mal-DNA1</b>                                                      |            |
| <b>Figure S2. Confirmation of NH<sub>2</sub>-DNA1 production using authentic sample</b>      |            |
| <b>Figure S3. Selectivity of PB-DNA for H<sub>2</sub>O<sub>2</sub></b>                       |            |
| <b>Figure S4. Collection and detection of NH<sub>2</sub>-dsDNA1 by using biotin labeling</b> |            |
| <b>Figure S5. Purification and recovery of biotin-DNA using the EtOH precipitation.</b>      |            |
| <b>Figure S6. Ratio of code DNA 1 to code DNA IS</b>                                         |            |
| <b>Figure S7. Reaction monitoring of Biotin-SS-DNA1 and GSH</b>                              |            |
| <b>Figure S8. Reaction monitoring of Mal-DNA1 and thiol metabolites</b>                      |            |
| <b>Table S1. DNA sequences in this study</b>                                                 |            |
| <b>3. Supporting references</b>                                                              | <b>S17</b> |

## **Supporting Methods**

### **General Methods**

Reagents were purchased from Wako pure chemical industries, Sigma Aldrich, Nacalai Tesque, Takara Bio, Dojindo, Tokyo chemical industries, New England BioLabs, and eurofins Genomics. Analytical and preparative high-performance liquid chromatographies were performed on a D2000 HPLC system and L7000 HPLC system (HITACHI) with reversed phase column (InerrtsilvODS-3, GL Science Inc.,  $\phi$  10 mm $\times$ 250 mm (particle size; 5  $\mu$ m),  $\phi$  4.6 mm $\times$ 250 mm (particle size; 5  $\mu$ m)). MALDI-TOF mass spectrometry were recorded on an AXIMER-LNR spectrometer (SHIMADZU). DNA hybridization and quantitative PCR (qPCR) analysis was carried out with MyGo Mini S Real Time PCR (IT-IS Life Science Ltd.).

### **1-1. Synthesis**

#### **Synthesis of Mal-DNA1 (Figure S1)**

Sulfo-SMCC (10  $\mu$ mol) were added the solution of NH<sub>2</sub>-DNA1 (5.0 nmol) in 100 mM pH8.7 carbonate-bicarbonate buffer and incubated at room temperature for 5 min. The reaction mixture was purified using Micro Bio-Spin™ 6 Columns (Bio-Rad) and milliQ water as an elution solution. The concentration of the oligomer was determined by complete digestion with alkaline phosphatase (AP), nuclease P1 (PI) and phosphodiesterase I at 37°C for overnight. Identities of synthesized oligomers

were confirmed by MALDI-TOF MS spectrometry ([M-H]<sup>-</sup> calcd. 6525.2, found. 6524.5). The purity of synthesized oligomer was confirmed by monitoring of UV absorbance at 260 nm at a flow rate of 0.6 (analysis) mLmin<sup>-1</sup> with a 0–25% (over 50 min) gradient of acetonitrile (ACN) / triethylammonium acetate buffer (TEAA buffer) (100 mM, pH 7.0).

### **Synthesis of PB-DNA, Biotin-DNA and Biotin-SS-DNA**

PB-DNA1, PB-DNA2,<sup>1</sup> Biotin-DNA1, Biotin-DNA IS,<sup>2</sup> and Biotin-SS-DNA1<sup>2</sup> was synthesized according to previous reports.

### **1-2. Reaction monitoring of Mal-DNA1, PB-DNA1 and Biotin-SS-DNA1**

The reaction mixtures were analyzed by HPLC. The column eluents were monitored by the UV absorbance at 260 nm at a flow rate of 0.6 (analysis) mLmin<sup>-1</sup> with a 0–25% (0–50 min) and 25–100% (50–60 min) gradient of ACN/TEAA buffer (100 mM, pH 7.0).

### **Reaction monitoring of Mal-DNA1 (Figure 2a, b)**

5 μM Mal-DNA1 was reacted with 0, 25, 50, or 150 μM GSH in phosphate buffer (PB, 250 mM, pH 7.4) for 1 h at room temperature. The reaction mixtures were analyzed by HPLC as described above.

#### **Reaction monitoring of PB-DNA1 (Figure 2c, d)**

5  $\mu\text{M}$  PB-DNA1 was reacted with 0, 25, 50, or 150  $\mu\text{M}$   $\text{H}_2\text{O}_2$  in PB (250 mM, pH 7.4) for 1 h at room temperature. The reaction mixtures were analyzed by HPLC as described above.

#### **Confirmation of $\text{NH}_2$ -DNA1 production using authentic sample (Figure S2)**

5  $\mu\text{M}$  PB-DNA1 was reacted with 1 mM  $\text{H}_2\text{O}_2$  in PB (250 mM, pH 7.4) for 1 h at room temperature.

A half of the reaction mixture (10  $\mu\text{L}$ ) was mixed with 5  $\mu\text{M}$   $\text{NH}_2$ -DNA1 (10  $\mu\text{L}$ , 50 pmol) and analyzed by HPLC as described above.

#### **Selectivity of PB-DNA for $\text{H}_2\text{O}_2$ (Figure S3)**

5  $\mu\text{M}$  PB-DNA1 was reacted with 0 or 50  $\mu\text{M}$   $\text{H}_2\text{O}_2$ , potassium superoxide,  $\text{NaOCl}$ ,  $\text{NOC7}$  or AAPH in PB (250 mM, pH 7.4) for 1 h at room temperature. The reaction mixtures were analyzed by HPLC as described above.

#### **Sample preparation**

**$\text{H}_2\text{O}_2$ .** The  $\text{H}_2\text{O}_2$  solution was diluted with milliQ water.

**$\text{ROO}^\cdot$ .** 2,2'-Azobis(2-amidinopropane)dihydrochloride (AAPH) was dissolved in milliQ water.

The solution was mixed with the PB-DNA solution immediately.

**O<sub>2</sub><sup>•-</sup>**. Potassium superoxide was dissolved in milliQ water. The solution was mixed with the PB-DNA solution immediately.

**NO**. 1-Hydroxy-2-oxo-3-(*N*-methyl-3-aminopropyl)-3-methyl-1-triazone (NOC7) was dissolved in milliQ solution. The solution was mixed with the PB-DNA solution immediately.

**•OCl**. NaOCl solution was diluted with milliQ solution.

#### **Purification and recovery of biotin-DNA using the EtOH precipitation (Figure S5)**

0 or 150 pmol NH<sub>2</sub>-DNA2 was incubated with 0 or 1 μmol biotin-AC5 sulfo-OSu in carbonate-bicarbonate buffer (200 mM, pH8.7, 20 μL) and incubated for 1 h at room temperature. After biotin labeling, the reaction solution (20 μL) was mixed with EtOH (60 μL) and AcONa buffer (5 M, pH5.2, 6.5 μL) on ice, and centrifuged at 15,000 g for 10 min at 4°C. After removal of supernatant, 75% EtOH (100 μL) was added to the pellet and centrifuged at 15,000 g for 4 min at 4°C. After removal of supernatant, the pellet was dried in air for 20 min at room temperature. The pellet was dissolved with milliQ (20 μL) for HPLC measurement. These samples were analyzed by HPLC as described above.

#### **Reaction monitoring Biotin-SS-DNA1 and GSH by using HPLC (Figure S7)**

5 μM Biotin-SS-DNA1 was reacted with 0 or 50 μM GSH in PB (250 mM, pH 8.6) for 1 h at room

temperature. The reaction mixtures were analyzed by HPLC as described above.

### **Reaction monitoring of Mal-DNA1 and thiol metabolites (Figure S8)**

5  $\mu$ M Mal-DNA1 was reacted with 0 or 50  $\mu$ M GSH, Cys or HCys in PB (250 mM, pH 7.4) for 1 h at room temperature. The reaction mixtures were analyzed by HPLC as described above.

### **1-3. Detection of target molecules by using qPCR**

#### **DNA hybridization**

500 nM code DNA and biotin-DNA, Mal-DNA, PB-DNA or NH<sub>2</sub>-DNA were hybridized in 5 mM MgCl<sub>2</sub>. DNA was heated to 95°C for 5 min and then cooled at a rate of 1°C per min to 25°C.

#### **qPCR measurements**

qPCR was performed according to the manufacturer's procedure using Luna Universal qPCR Master Mix (NEW ENGLAND Bio Labs): 2 min at 95°C, followed by 40 cycles of 10 sec at 95°C and 30 sec at 60°C.

### **Simultaneous detection of GSH and H<sub>2</sub>O<sub>2</sub> using the DNA probe cocktail (Figure 3b)**

**Mal-dsDNA1** (1.5 pmol), **PB-dsDNA2** (1.5 pmol) and **Biotin-dsDNA IS** (1.5 pmol) were incubated

with GSH (0 or 1 nmol) and H<sub>2</sub>O<sub>2</sub> (0 or 10 nmol) in PB (250 mM, pH7.4) for 1 h at room temperature. After reaction, the reaction solution (20 µL) was mixed with EtOH (60 µL) and AcONa buffer (5 M, pH5.2, 6.5 µL) on ice, and centrifuged at 15,000 g for 10 min at 4°C. After removal of supernatant, 75% EtOH (100 µL) was added to the pellet and centrifuged at 15,000 g for 4 min at 4°C. After removal of supernatant, the pellet was dried in air for 15 min at room temperature. The pellet was dissolved with biotin-AC<sub>5</sub> sulfo-OSu (10 nmol) in carbonate-bicarbonate buffer (200 mM, pH8.7, 20 µL) and incubated for 1 h at room temperature. After the reaction, the reaction solution was purified by using EtOH precipitation as described above. The pellet was dissolved with binding buffer (10 mM Tris-HCl (pH 7.4), 0.5 mM EDTA, 1 M NaCl, 0.05% Tween20). The solution was rotating for 10 min with streptavidin coated magnetic beads (50 µg, Magnosphere™ MS300/Streptavidin, JSR corporation) at room temperature. After removal of supernatant, magnetic beads were washed with binding buffer (200 µL) twice and milliQ (100 µL). After wash, milliQ (50 µL) was added and the code DNAs (**1**, **2** and **IS**) were released by heating (95°C for 5 min). After cooling on ice (15 sec), the supernatant was diluted with milliQ water (×1000), code DNAs (**1**, **2** and **IS**) in the sample were quantified by using qPCR as described above.

#### **Quantification of GSH using the Mal-dsDNA1 (Figure 3c)**

**Mal-dsDNA1** (1.5 pmol) and **Biotin-dsDNA IS** (1.5 pmol) were incubated with GSH (0, 4, 12 or 40

pmol) in PB (250 mM, pH7.4) for 1 h at room temperature. After the reaction, the reaction solution was purified by using EtOH precipitation. The pellet was dissolved with biotin-AC<sub>5</sub> sulfo-OSu (10 nmol) in carbonate-bicarbonate buffer (200 mM, pH8.7, 20 µL) and incubated for 1 h at room temperature. After the reaction, the reaction solution was purified by using EtOH precipitation. By using streptavidin coated magnetic beads, collected code DNAs (**1** and **IS**) in the sample were quantified as described above.

#### **Detection of biotin-dsDNA1 or NH<sub>2</sub>-dsDNA1 using magnetic beads (Figure S4)**

**Biotin-dsDNA1** (1.5 pmol) or **NH<sub>2</sub>-dsDNA1** (1.5 pmol) was incubated with biotin-AC<sub>5</sub> sulfo-OSu (0 or 100 nmol) in carbonate-bicarbonate buffer (200 mM, pH8.7) for 1 h at room temperature. After the reaction, the reaction solution was purified by using EtOH precipitation. By using streptavidin coated magnetic beads, collected code DNA1 from **Biotin-dsDNA1** or **NH<sub>2</sub>-dsDNA1** was quantified as described above.

#### **Evaluation of an amount of biotin-AC<sub>5</sub> sulfo-OSu and internal standard (Figure S6)**

**NH<sub>2</sub>-dsDNA1** (1.5 pmol) or **dsDNA1** (1.5 pmol) and **biotin-dsDNA IS** (1.5 pmol) were incubated with biotin-AC<sub>5</sub> sulfo-OSu (10 nmol) in carbonate-bicarbonate buffer (200 mM, pH8.7) for 1 h at room temperature. After the reaction, the reaction solution was purified by using EtOH precipitation.

By using streptavidin coated magnetic beads, collected code DNAs (**1** and **IS**) from **NH<sub>2</sub>-dsDNA1** or **biotin-dsDNA IS** was quantified as described above.

#### **1-4. Detection of GSH in cell extract**

##### **Cell culture**

Human lung cancer cell line, A549 were cultured in DMEM medium supplemented with 10% fetal bovine serum (FBS), 1% penicillin-streptomycin (PS). The cells were maintained at 37°C in 5% CO<sub>2</sub> / 95% air and were kept in a logarithmic growth phase by routine passages every 2–3 days. Prior to the use of cells, the densities of cells were determined using a hemocytometer.

##### **Detection of GSH derived from cell extract (Figure 3d)**

A549 cells (0 or  $3.0 \times 10^5$  cells per well) were seeded onto 6 well plate in 3 mL DMEM. Plate was maintained at 37°C in 5% CO<sub>2</sub> / 95% air incubator for 24 h. After washing with D-PBS (-) twice, methanol (500 µL) was added into each well and incubated for 15 min. Then, the solution (200 µL) were collected and extracted with milliQ (100 µL) and CHCl<sub>3</sub> (200 µL). After centrifugation at 12,000 g for 15 min at 4°C, aqueous layer (250 µL) was lyophilized. Cell extract was dissolved with 0 or 100 mM N-methylmaleimide (NMM) in milliQ (12 µL) and incubated for 30 min. The cell

number used in this assay was determined by using another cell seeded well.

**Mal-dsDNA1** (1.5 pmol) and **Biotin-dsDNA IS** (1.5 pmol) was incubated in PB (pH7.4, 250 mM, total 32  $\mu$ L) containing 31% cell extract solution (NMM +/-) for 1 h at room temperature. After reaction, the reacted solution was mixed with EtOH (96  $\mu$ L) and AcONa buffer (5 M, pH5.2, 10.5  $\mu$ L) on ice, and centrifuged at 15,000 g for 10 min at 4°C. After removal of supernatant, 75% EtOH (100  $\mu$ L) was added to the pellet and centrifuged at 15,000 g for 4 min at 4°C. After removal of supernatant, the pellet was dried in air for 15 min at room temperature. The pellet was dissolved with biotin-AC<sub>5</sub> sulfo-OSu (10 nmol) in carbonate-bicarbonate buffer (pH8.7, 200 mM, 20  $\mu$ L) and incubated for 1 h at room temperature. After the reaction, the reaction solution was purified by using EtOH precipitation as described above. By using the streptavidin, coated magnetic beads, collected code DNAs (**1** and **IS**) were quantified as described above.

## 2. Supporting Figures

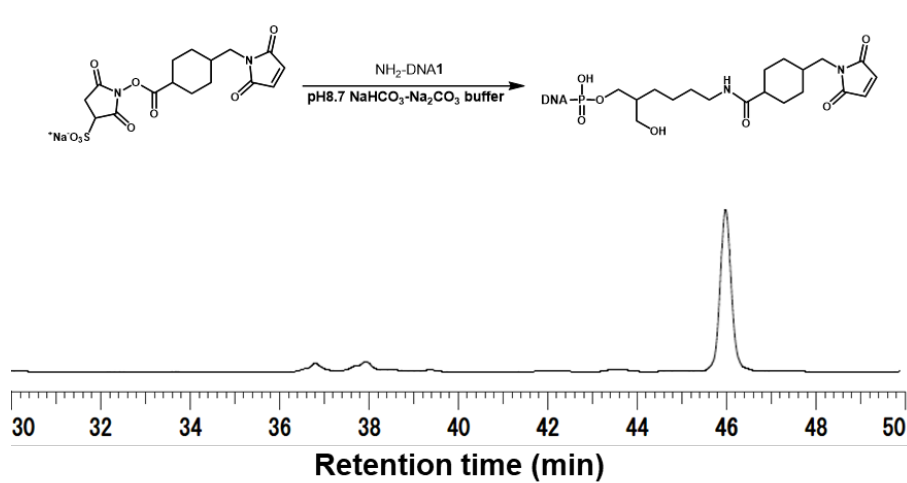

**Figure S1. Synthesis of Mal-DNA1.** HPLC chart of Mal-DNA1.

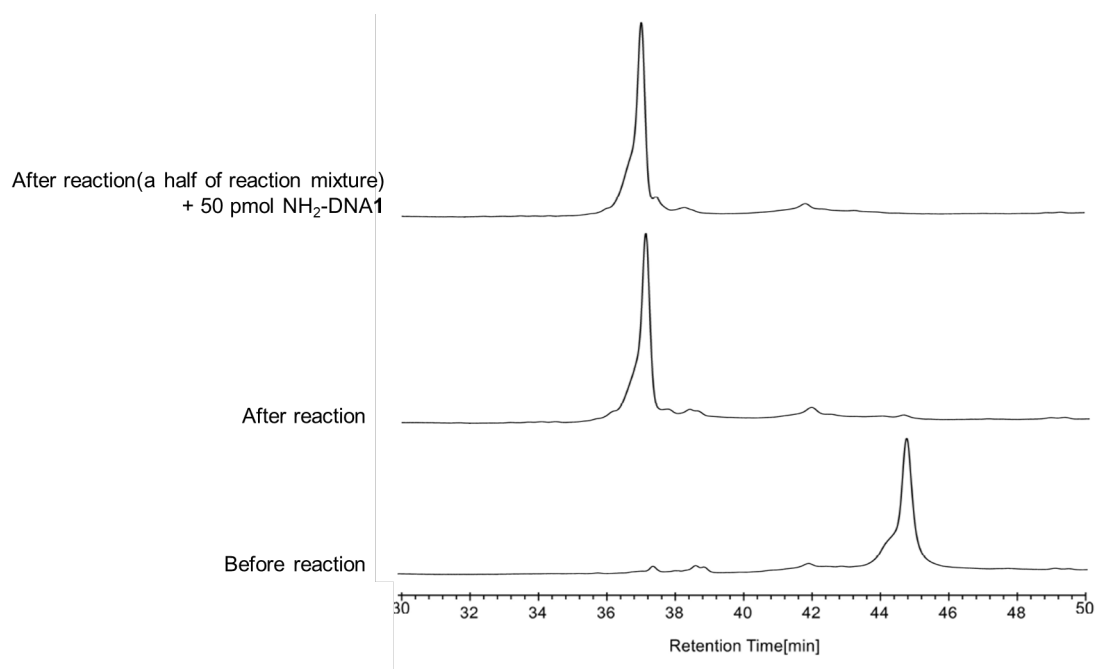

**Figure S2. Confirmation of  $\text{NH}_2\text{-DNA1}$  production using authentic sample.** HPLC chart of  $5 \mu\text{M}$  PB-DNA1 incubated with  $1 \text{ mM}$   $\text{H}_2\text{O}_2$  in  $250 \text{ mM}$  PB ( $\text{pH} 7.4$ ,  $20 \mu\text{L}$ ) for  $1 \text{ h}$  at  $37^\circ\text{C}$  and a half of reaction mixture with  $50 \text{ pmol}$   $\text{NH}_2\text{-DNA1}$ .

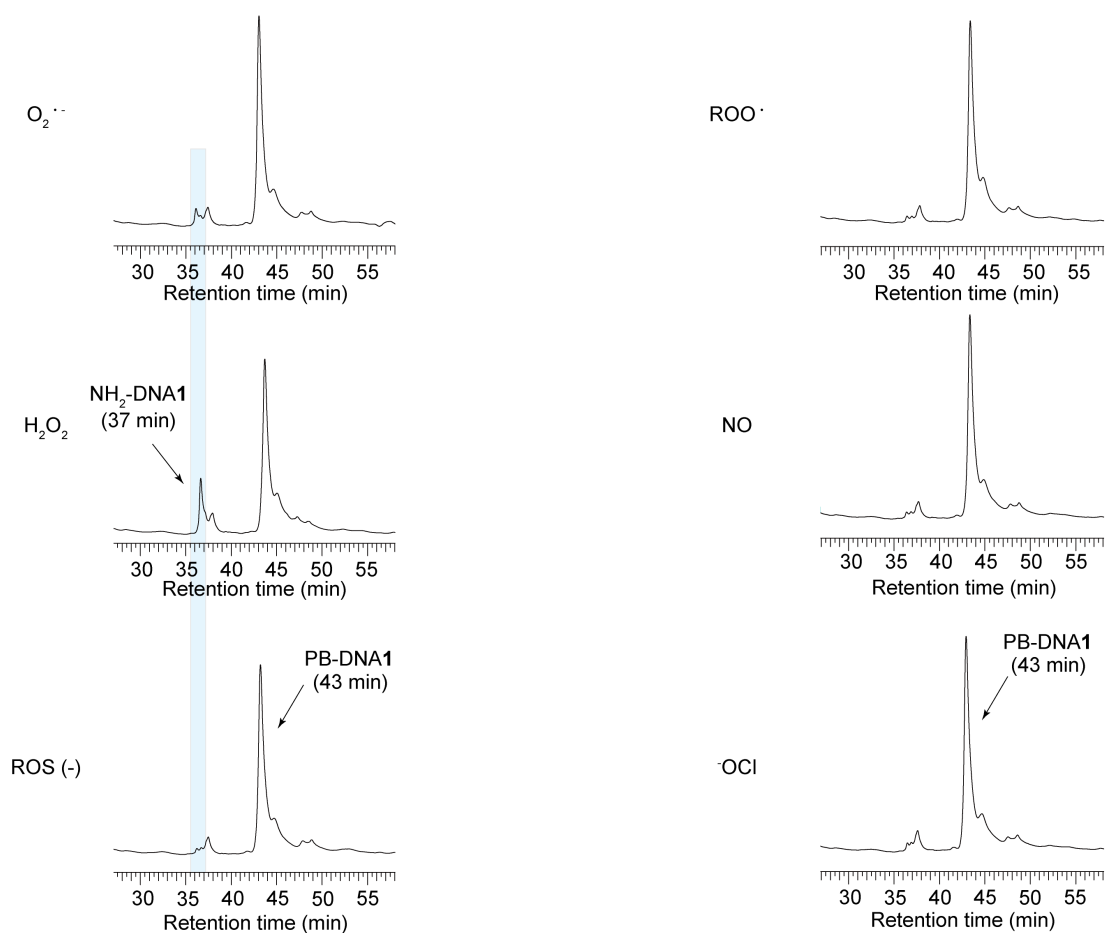

**Figure S3. Selectivity of PB-DNA for  $\text{H}_2\text{O}_2$ .** 5  $\mu\text{M}$  PB-DNA1 reacted with 0 or 50  $\mu\text{M}$   $\text{H}_2\text{O}_2$ , potassium superoxide, NaOCl, NOC7 or AAPH in 250 mM phosphate buffer (pH 7.4) for 1 h at room temperature.

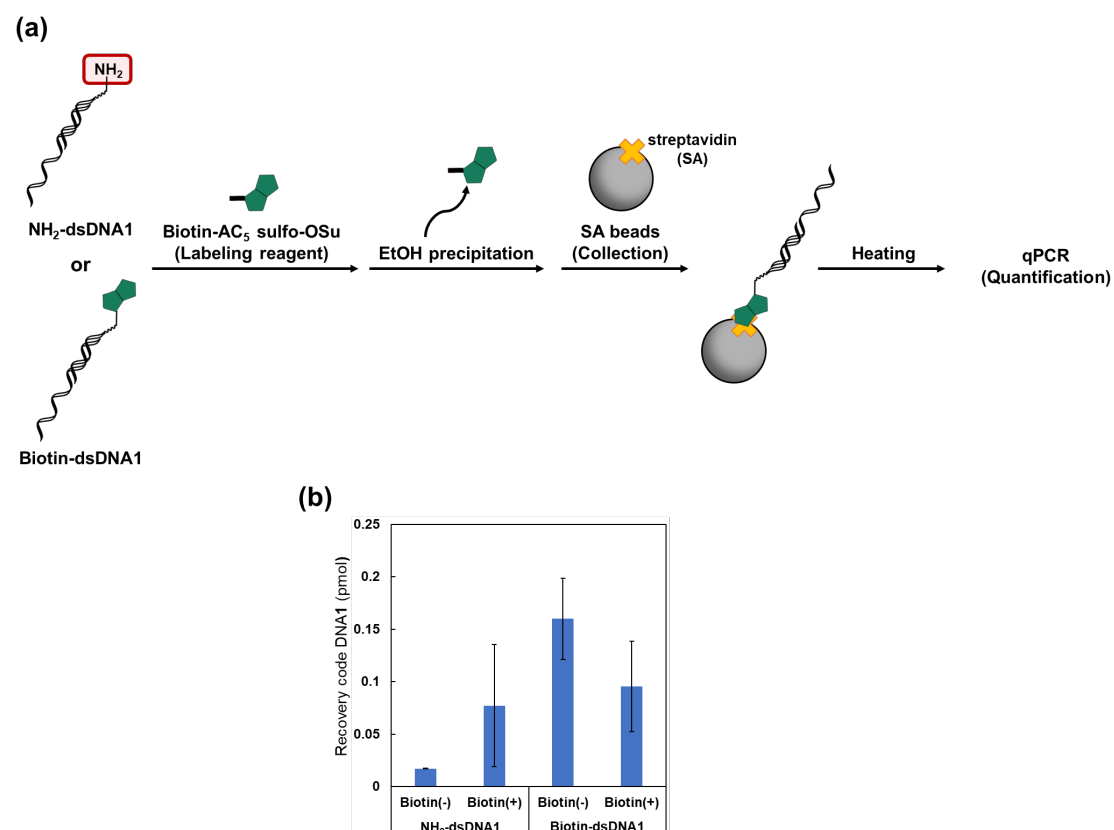

**Figure S4. Collection and detection of NH<sub>2</sub>-dsDNA1 by using biotin labelling.** (a) Schematic illustration of NH<sub>2</sub>-dsDNA1 or Biotin-dsDNA1 collection by using streptavidin coated magnetic beads. (b) Quantification of collected code DNA1 from NH<sub>2</sub>-dsDNA1 or Biotin-dsDNA1. Data = mean  $\pm$  SD (n=3).

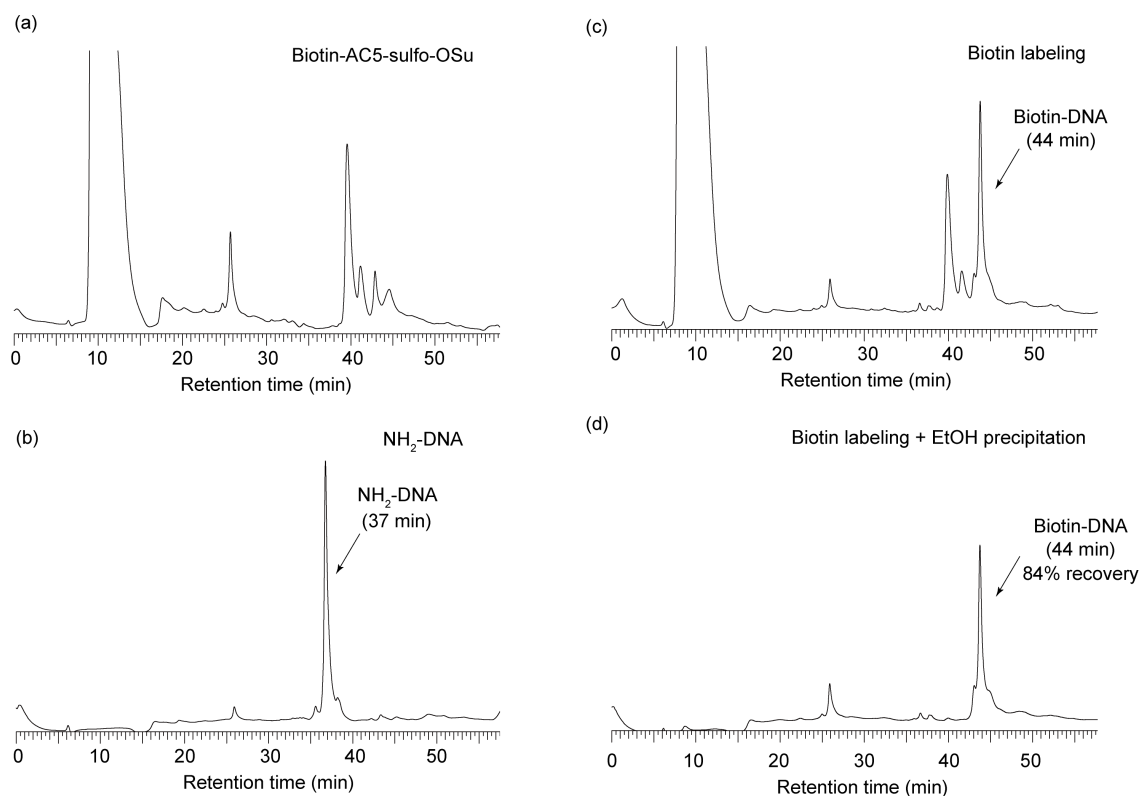

**Figure S5. Purification and recovery of biotin-DNA using the EtOH precipitation.** (a–c) Reaction monitoring using HPLC; 0 or 150 pmol  $\text{NH}_2$ -DNA2 was incubated with 0 or 1  $\mu\text{mol}$  biotin-AC5 sulfo-OSu in 200 mM carbonate-bicarbonate buffer (pH 8.7) for 1 h at room temperature. (d) After biotin labeling, the reaction solution was purified by using EtOH precipitation.

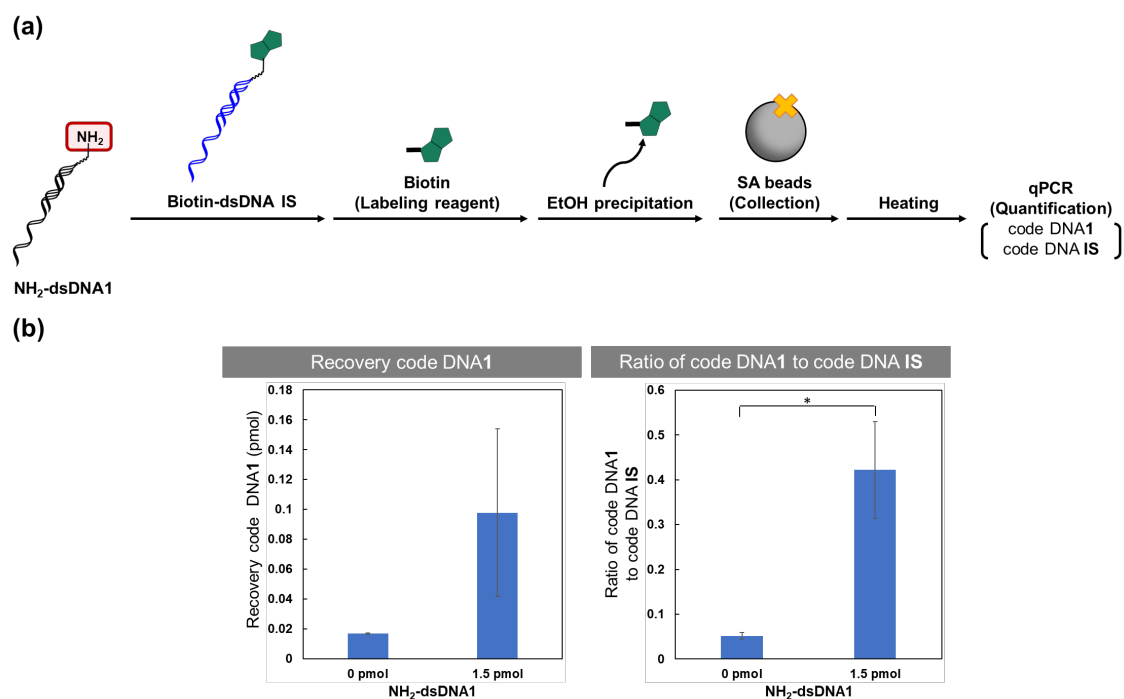

**Figure S6. Ratio of code DNA1 to code DNA IS** (a) Schematic illustration of code DNA 1 and IS collection by using streptavidin coated magnetic beads. (b) Amount of recovery code DNA 1 and ratio of code DNA1 to code DNA IS. Data = mean  $\pm$  SD (n=3). \* p < 0.05 (Student t-test)

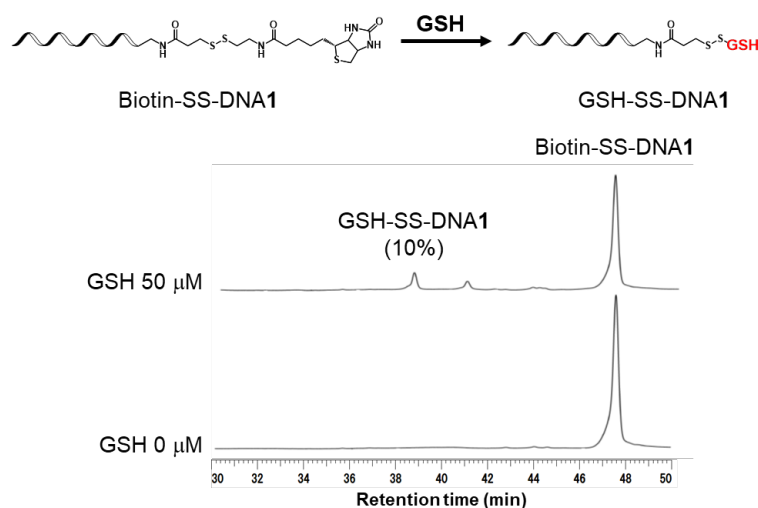

**Figure S7. Reaction monitoring of Biotin-SS-DNA1 and GSH (ref 2).** 5  $\mu$ M Biotin-SS-DNA1 reacted with 0 or 50  $\mu$ M GSH in PB (pH8.6, 250 mM) for 1 h at room temperature.

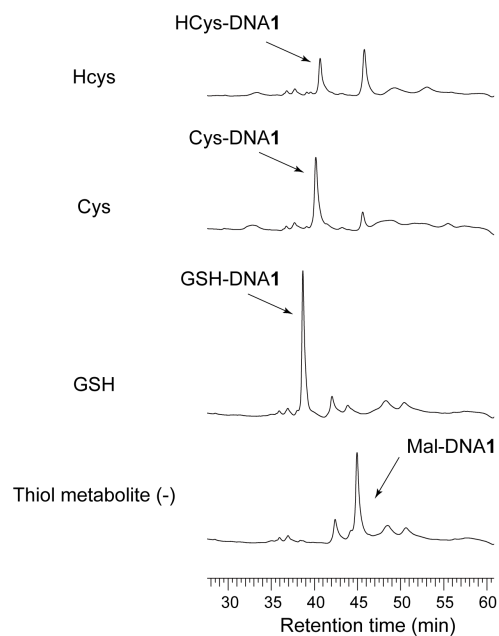

**Figure S8. Reaction monitoring of Mal-DNA1 and thiol metabolites** Reaction monitoring using HPLC; 5  $\mu$ M Mal-DNA1 reacted with 0 or 50  $\mu$ M GSH, Cys or HCys in 250 mM phosphate buffer (pH 7.4) for 1 h at room temperature.

**Table S1. DNA sequences in this study**

| Strand name                      | Sequences (5' to 3')                                                        |
|----------------------------------|-----------------------------------------------------------------------------|
| DNA1                             | GGT CCA ATC TAC AGG AAT TC                                                  |
| NH <sub>2</sub> -DNA1            | GGT CCA ATC TAC AGG AAT TC-NH <sub>2</sub>                                  |
| code DNA1                        | GAA TTC CTG TAG ATT GGA CCT TTT TTT TTT TTT TTT CGA CCC TAA GCA TAC ATA CCT |
| Forward primer (for code DNA1)   | AGG TAT GTA TGC TTA GGG TCG                                                 |
| Reverse primer (for code DNA1)   | GAA TTC CTG TAG ATT GGA CC                                                  |
| NH <sub>2</sub> -DNA2            | AAG CTT CGA GTG ACT GCG AT-NH <sub>2</sub>                                  |
| code DNA2                        | ATC GCA GTC ACT CGA AGC TTT TTT TTT TTT TTT TTT CCG TCC TTC ATT ATG GAA GTC |
| Forward primer (for code DNA2)   | GAC TTC CAT AAT GAA GGA CG                                                  |
| Reverse primer (for code DNA2)   | ATC GCA GTC ACT CGA AGC TT                                                  |
| NH <sub>2</sub> -DNA IS          | CTT AAG GAC ATC TAA CCT GG-NH <sub>2</sub>                                  |
| code DNA IS                      | CCA GGT TAG ATG TCC TTA AGT TTT TTT TTT TTT TTT TCC ATA CAT ACG AAT CCC AGC |
| Forward primer (for code DNA IS) | GCT GGG ATT CGT ATG TAT GGA                                                 |
| Reverse primer (for code DNA IS) | CCA GGT TAG ATG TCC TTA AG                                                  |

### 3. Supporting references

(1) Y. Motohashi, T. Nishihara, and K. Tanabe, *Chem. Lett.* **2023**, 52, 732-735

(2) Y. Motohashi, S. Moritani, T. Nishihara, and K. Tanabe, *ChemistrySelect*, **2023**, 8, e202302662.
